# Supplementary material
Source: publisher site journal article supplement (https://static.cambridge.org/content/id/urn:cambridge.org:id:article:S1935789320000129/resource/name/S1935789320000129supp001.pdf)
Supplement: Supplementary file 1 [file S1935789320000129supp001.pdf]

**Supplementary Appendix:**

**A retrospective analysis of mortality from Gorkha earthquakes-2015 of Nepal: evidence and future recommendations**

Bipin Adhikari<sup>1\*</sup>, Parash Mani Bhandari<sup>2</sup>, Dipika Neupane<sup>2</sup>, Shiva Raj Mishra<sup>3</sup>

<sup>1</sup>Nepal Community Health and Development Centre, Balaju, Kathmandu, Nepal

<sup>2</sup>Department of Epidemiology, Biostatistics and Occupational Health, McGill University, Montreal, Quebec

<sup>3</sup>Nepal Development Society, Bhratpur-10, Nepal

\*Corresponding author:

Bipin Adhikari,

Nepal Community Health and Development Centre, Kathmandu, Nepal

Email: [biopion@gmail.com](mailto:biopion@gmail.com)

**Supplementary table 1: Age specific-mortality rate by earthquake affected districts in Gorkha earthquakes (N=8,151)**

| Districts              | Age groups |       |       |       |       |        |       |        |        |         |         |         |         |         |         |         |         |         |         |
|------------------------|------------|-------|-------|-------|-------|--------|-------|--------|--------|---------|---------|---------|---------|---------|---------|---------|---------|---------|---------|
|                        | 0 - 4      | 5-9   | 10-14 | 15-19 | 20-24 | 25-29  | 30-34 | 35-39  | 40-44  | 45 - 49 | 50 - 54 | 55 - 59 | 60 - 64 | 65 - 69 | 70 - 74 | 75 - 79 | 80 - 84 | 85 - 89 | >=90    |
| <b>Sindhupalchowk</b>  | 2093.3     | 990.1 | 528.2 | 467.4 | 697.0 | 515.6  | 595.0 | 658.8  | 632.6  | 974.9   | 938.4   | 1123.6  | 1419.4  | 2118.0  | 3138.0  | 3255.8  | 5147.1  | 6136.8  | 5667.1  |
| <b>Rasuwa</b>          | 962.0      | 884.4 | 583.0 | 714.9 | 696.3 | 1331.3 | 630.6 | 1027.0 | 1108.1 | 1226.5  | 1313.4  | 769.7   | 1137.1  | 2648.4  | 3100.8  | 1788.6  | 8547.0  | 5454.5  | 10576.9 |
| <b>Nuwakot</b>         | 667.7      | 275.5 | 124.7 | 76.6  | 102.7 | 146.0  | 106.5 | 171.4  | 123.0  | 189.4   | 163.4   | 235.9   | 251.5   | 437.5   | 814.6   | 701.4   | 1656.3  | 1853.6  | 1930.6  |
| <b>Dhading</b>         | 322.3      | 225.4 | 105.7 | 104.0 | 114.1 | 108.5  | 90.4  | 84.2   | 100.0  | 254.8   | 135.6   | 159.0   | 357.2   | 356.6   | 716.1   | 582.1   | 1273.1  | 1995.7  | 3261.8  |
| <b>Gorkha</b>          | 270.4      | 132.2 | 79.2  | 54.6  | 100.0 | 105.6  | 54.7  | 80.3   | 59.3   | 83.8    | 83.7    | 164.0   | 295.0   | 311.7   | 526.2   | 378.8   | 791.6   | 1473.7  | 1755.6  |
| <b>Kavrepalanchowk</b> | 234.2      | 63.6  | 24.3  | 30.5  | 30.5  | 23.2   | 15.6  | 64.4   | 35.3   | 70.9    | 73.2    | 69.2    | 141.3   | 162.9   | 356.3   | 234.8   | 811.6   | 1040.8  | 1141.1  |
| <b>Bhaktapur</b>       | 100.7      | 93.8  | 33.3  | 53.4  | 60.5  | 42.1   | 69.5  | 68.3   | 97.7   | 110.3   | 102.3   | 101.5   | 258.8   | 279.6   | 559.0   | 606.4   | 1060.5  | 1516.9  | 1603.8  |
| <b>Dolakha</b>         | 90.6       | 40.8  | 25.5  | 72.9  | 49.0  | 98.4   | 38.7  | 78.3   | 38.1   | 41.2    | 65.0    | 104.8   | 133.3   | 71.3    | 203.3   | 223.3   | 558.7   | 817.4   | 2485.6  |
| <b>Lalitpur</b>        | 77.3       | 48.5  | 33.5  | 18.4  | 15.9  | 13.8   | 13.5  | 25.5   | 21.7   | 52.7    | 36.4    | 20.8    | 49.6    | 41.6    | 172.7   | 223.2   | 374.5   | 417.8   | 629.2   |
| <b>Kathmandu</b>       | 70.7       | 66.5  | 46.5  | 42.8  | 46.8  | 58.2   | 48.5  | 61.7   | 65.1   | 74.9    | 95.4    | 98.7    | 122.4   | 120.9   | 208.9   | 136.6   | 317.6   | 311.7   | 144.7   |
| <b>Total*</b>          | 77.8       | 43.0  | 25.9  | 25.8  | 29.9  | 31.0   | 27.0  | 35.1   | 35.3   | 52.2    | 52.8    | 58.2    | 84.5    | 114.0   | 213.3   | 208.6   | 451.0   | 557.6   | 509.7   |

\*all the 36 districts. Mortality rate depicted per 100,000 population

**Supplementary table 2: Gender specific mortality rate by districts in Gorkha earthquakes (N=8,151)**

| <b>District</b> | <b>Male mortality rate</b> | <b>Female Mortality rate</b> |
|-----------------|----------------------------|------------------------------|
| Sindhupalchowk  | 1037.8                     | 1255.3                       |
| Kathmandu       | 56.0                       | 62.8                         |
| Nuwakot         | 249.3                      | 261.1                        |
| Dhading         | 213.1                      | 204.8                        |
| Rasuwa          | 1058.3                     | 1314.7                       |
| Gorkha          | 180.0                      | 161.5                        |
| Bhaktapur       | 68.4                       | 128.1                        |
| Kavre           | 75.9                       | 85.0                         |
| Lalitpur        | 28.8                       | 42.4                         |
| Dolakha         | 92.4                       | 81.2                         |
| Ramechhap       | 15.7                       | 22.5                         |
| Makwanpur       | 6.9                        | 8.4                          |
| Okhaldhunga     | 14.4                       | 11.1                         |
| Solukhumbu      | 25.6                       | 11.2                         |
| Sindhuli        | 3.4                        | 5.7                          |
| Sunsari         | 0.7                        | 1.4                          |
| Chitwan         | 1.6                        | 0.6                          |
| Parsa           | 0.3                        | 1.6                          |
| Bara            | 0.0                        | 1.3                          |
| Lamjung         | 3.9                        | 2.1                          |
| Mahottari       | 0.6                        | 0.3                          |
| Rautahat        | 0.3                        | 0.5                          |
| Bhojpur         | 0.0                        | 2.2                          |
| Kaski           | 0.4                        | 0.4                          |

|             |     |     |
|-------------|-----|-----|
| Morang      | 0.2 | 0.2 |
| Sarlahi     | 0.2 | 0.2 |
| Dhanusa     | 0.2 | 0.0 |
| Gulmi       | 0.0 | 0.7 |
| Nawalparasi | 0.0 | 0.3 |
| Palpa       | 0.0 | 0.7 |
| Rolpa       | 0.9 | 0.0 |
| Rukum       | 1.0 | 0.0 |
| Taplejung   | 0.0 | 1.5 |
| Terhathum   | 2.1 | 0.0 |
| Udaypur     | 0.0 | 0.5 |

\*mortality rate depicted per 100,000 population
